# Supplementary material
Source: MDPI journal article supplement (https://www.mdpi.com/2071-1050/11/15/4002)
Supplement: s1 [file s1]

## Supplementary Material

**Table S1.** Guiding questions to determine the differentiation of the impact factors from the optimum to the minimum scenario.

| Key Impact Factors                                                                                                                       | Description                                                                                                                                                                                                                                                                                                                                                                                                                                                                                                                                                            |
|------------------------------------------------------------------------------------------------------------------------------------------|------------------------------------------------------------------------------------------------------------------------------------------------------------------------------------------------------------------------------------------------------------------------------------------------------------------------------------------------------------------------------------------------------------------------------------------------------------------------------------------------------------------------------------------------------------------------|
| <b>Framing conditions</b>                                                                                                                |                                                                                                                                                                                                                                                                                                                                                                                                                                                                                                                                                                        |
| Guiding questions<br>Stakeholder process factor "Prior planning-Higher-level information:"                                               | Which plans/programs/strategies serve as a source of information, containing objectives, information, and measures that target the incorporation of climate change adaptation in EIA?                                                                                                                                                                                                                                                                                                                                                                                  |
| Supportive questions for the stakeholder process factor "Prior planning-Higher-level information:"                                       | Is tiering possible between SEA and EIA regarding the consideration of climate change adaptation and if so, for which sectors/types of projects? Do you know benefits and limitations based on personal experience of tiering between SEA and EIA?                                                                                                                                                                                                                                                                                                                     |
| Guiding questions<br>Stakeholder process factor "Guidance-official support complementing the legal provisions"                           | Which support is available to consider climate change impacts in EIA and project planning? Which support would be necessary to consider climate change impacts in EIA and project planning?                                                                                                                                                                                                                                                                                                                                                                            |
| Supportive questions for the stakeholder process "Guidance-official support complementing the legal provisions"                          | Which format is most suitable? Which topics should be covered? What is the appropriate level of detail/amount of information to be covered?                                                                                                                                                                                                                                                                                                                                                                                                                            |
| Guiding questions<br>Stakeholder process factor "Procedural consideration"                                                               | How should EIA consider climate change impacts during the methodological approach and procedural steps?                                                                                                                                                                                                                                                                                                                                                                                                                                                                |
| Supportive questions for the stakeholder process factor "Procedural consideration"                                                       | Which steps of the EIS/EIA are central for the integration of climate change in your point of view? How should information to describe the environment in the case of non-implementation of the project (zero alternatives) be deduced? How far can EIA consider climate change impacts during the assessment of significant environmental impacts and/or during the application of the mitigation hierarchy? Can an early climate change impact check during scoping facilitate the consideration during the EIA process and avoid overshooting efforts/expenditures? |
| <b>Data and information</b>                                                                                                              |                                                                                                                                                                                                                                                                                                                                                                                                                                                                                                                                                                        |
| Guiding questions<br>Stakeholder process factor "Information on climate change:"                                                         | Which climate data should be included in EIA?                                                                                                                                                                                                                                                                                                                                                                                                                                                                                                                          |
| Supportive questions for the stakeholder process factor "Information on climate change"                                                  | Which meteorological parameters are suitable standards from which to draw conclusions about the impact on environmental issues in the EIA? Which timeframes and scales for climate parameters make sense in EIA and should be standardized? How should EIA practitioners deal with the range and uncertainty in the climate projections (scenarios)?                                                                                                                                                                                                                   |
| Guiding questions<br>Stakeholder process factor "Information regarding the impact of climate change on the environmental issues in EIA"  | How can EIA integrate prognoses on susceptibility or climate sensitivity of environmental issues (regarding the two example climate change impacts)–at which stages in the process is which information necessary (e.g., presentation of the current status, zero alternative or assessment of environmental impacts)?                                                                                                                                                                                                                                                 |
| Supportive questions for the stakeholder process "Information regarding the impact of climate change on the environmental issues in EIA" | How can the sensitivity of environmental issues to climate change be ascertained? How far can EIA consider changing conditions, which some plant and animal species might encounter due to adverse future conditions and which may be condemned to local extinction? Which information is missing in this regard–based on the status-quo of consideration in the procedural steps of the EIA? How can mitigation and compensation measures                                                                                                                             |

| Key Impact Factors                   | Description                                                                                                                                                                                                                                               |
|--------------------------------------|-----------------------------------------------------------------------------------------------------------------------------------------------------------------------------------------------------------------------------------------------------------|
|                                      | be planned in a way that they will also maintain their functionality under uncertain climate change conditions? How can such measures be monitored to guarantee their functionality?                                                                      |
| <b>Capacities of relevant actors</b> |                                                                                                                                                                                                                                                           |
| Guiding question “Role & Know-how”?  | Which information is the project applicant required to provide, and which information ought the relevant authorities to provide (feasibility among the actors)?                                                                                           |
| Guiding question “Values”?           | What influence does your or your business’ personal or institutional set of values have on your classification of scenarios and on your answers to the questions thus far? What could change in this respect, what is realistic, what would be necessary? |
